# Supplementary material for: Old age mortality and macroeconomic cycles
Source: HighWire-hosted journal article supplement (doi:10.1136/jech-2013-202544), 2013-10-07
Supplement: jech-2013-202544supp_appendix.pdf [file jech-2013-202544supp_appendix.pdf]

**Appendix table 1: Associations between macroeconomic cycles and cyclical variation in mortality, by country, sex and age group.** Shown are associations of a 1% rise in the macroeconomic cycle with a change in the cyclical variation of mortality, together with the 95% confidence intervals. Estimates are coefficients from a linear regression model with corresponding 95% confidence intervals.

|                      | Men 40-44   |                          | Men 70-74       |                          | Women 40-44 |                        | Women 70-74 |                        |
|----------------------|-------------|--------------------------|-----------------|--------------------------|-------------|------------------------|-------------|------------------------|
| <i>United States</i> | 0.31        | (-0.04 to 0.66)          | 0.23            | (-0.01 to 0.46)          | 0.10        | (-0.11 to 0.30)        | -0.47       | (-1.03 to 0.09)        |
| <i>Switzerland</i>   | 0.06        | (-0.45 to 0.56)          | 0.52            | (0.20 to 0.84)**         | -0.28       | (-0.64 to 0.08)        | 0.12        | (-0.08 to 0.32)        |
| <i>Canada</i>        | 0.17        | (-0.29 to 0.63)          | 0.13            | (-0.16 to 0.43)          | 0.09        | (-0.34 to 0.51)        | -0.22       | (-0.33 to -0.11)***    |
| <i>Denmark</i>       | 1.10        | (0.41 to 1.80)**         | 0.39            | (-0.06 to 0.84)          | 0.98        | (0.47 to 1.48)***      | 0.52        | (0.06 to 0.99)*        |
| <i>Norway</i>        | 1.26        | (0.45 to 2.07)**         | NA <sup>1</sup> |                          | 0.15        | (-0.45 to 0.75)        | 0.13        | (-0.35 - 0.61)         |
| <i>Australia</i>     | 0.58        | (-0.21 to 1.37)          | 0.71            | (0.19 to 0.23)**         | 1.71        | (1.13 to 2.28)***      | 0.52        | (0.02 to 1.02)*        |
| <i>Sweden</i>        | 0.55        | (-0.30 to 1.40)          | 0.26            | (-0.14 to 0.66)          | 0.43        | (0.02 to 0.83)*        | -0.13       | (-0.26 to -0.01)*      |
| <i>Netherlands</i>   | 0.60        | (0.09 to 1.12)*          | 0.25            | (-0.10 to 0.61)          | -0.04       | (-0.56 to 0.48)        | 0.22        | (-0.11 to 0.54)        |
| <i>France</i>        | 0.67        | (0.24 to 1.10)**         | 0.65            | (0.50 to 0.80)***        | -0.21       | (-0.50 to 0.09)        | 0.18        | (-0.01 to 0.37)        |
| <i>UK</i>            | 0.19        | (-0.21 to 0.59)          | 0.07            | (-0.47 to 0.62)          | 0.43        | (0.01 to 0.86)*        | 0.18        | (-0.33 to 0.70)        |
| <i>Belgium</i>       | 0.31        | (0.05 to 0.57)*          | 0.35            | (-0.15 to 0.86)          | 0.34        | (0.01 to 0.67)*        | 0.54        | (0.33 to 0.76)***      |
| <i>Austria</i>       | 1.38        | (0.92 to 1.83)***        | 0.91            | (0.60 to 1.22)***        | 0.25        | (-0.16 to 0.65)        | 0.52        | (0.27 to 0.76)***      |
| <i>New Zealand</i>   | -0.11       | (-0.87 to 0.64)          | 0.31            | (-0.08 to 0.69)          | 0.42        | (-0.38 to 1.23)        | 0.08        | (-0.36 to 0.52)        |
| <i>Japan</i>         | -0.15       | (-0.31 to 0.01)          | 0.01            | (-0.12 to 0.14)          | -0.38       | (-0.50 to -0.27)***    | 0.04        | (-0.10 to 0.17)        |
| <i>Finland</i>       | 0.36        | (-0.11 to 0.83)          | 0.03            | (-0.33 to 0.39)          | -0.67       | (-0.99 to -0.35)***    | 0.05        | (-0.28 to 0.38)        |
| <i>Italy</i>         | 0.51        | (0.32 to 0.70)***        | 0.82            | (0.63 to 1.00)***        | -0.05       | (-0.16 to 0.06)        | 0.31        | (0.22 to 0.41)***      |
| <i>Ireland</i>       | 0.20        | (-0.21 to 0.60)          | -0.41           | (-1.06 to 0.23)          | 0.45        | (0.26 to 0.64)***      | -0.44       | (-0.77 to -0.11)*      |
| <i>Spain</i>         | -0.03       | (-0.29 to 0.24)          | 0.30            | (0.21 to 0.39)***        | -0.24       | (-0.60 to 0.12)        | 0.26        | (0.15 to 0.36)***      |
| <i>Portugal</i>      | 0.08        | (-0.20 to 0.36)          | 0.61            | (0.49 to 0.73)***        | 0.05        | (-0.14 to 0.24)        | 0.60        | (0.47 to 0.73)***      |
| <b>All countries</b> | <b>0.38</b> | <b>(0.19 to 0.56)***</b> | <b>0.36</b>     | <b>(0.22 to 0.50)***</b> | <b>0.15</b> | <b>(-0.04 to 0.34)</b> | <b>0.18</b> | <b>(0.04 to 0.32)*</b> |

\* =  $p < 0.05$ ; \*\* =  $p < 0.01$ ; \*\*\* =  $p < 0.001$

<sup>1</sup> The regression analysis for men 70-74 could not be performed for Norway, as conversion of autocorrelation was not possible.
